# Supplementary material for: CdSe quantum dot/white graphene hexagonal porous boron nitride sheet (h-PBNs) heterostructure photocatalyst for solar driven H2 production
Source: Royal Society of Chemistry journal article supplement (doi:10.1039/d1tc01556g), 2021-01-01
Supplement: d1tc01556g1.pdf [file d1tc01556g1.pdf]

## CdSe Quantum Dots/White Graphene Hexagonal Porous Boron Nitride Sheet (h-PBNs)

### Heterostructure Photocatalyst for Solar Driven H<sub>2</sub> Production

Shakeelur Raheman AR<sup>a</sup>, Rupali S. Mane<sup>a</sup>, Higgins M. Wilson<sup>a</sup>, and Neetu Jha<sup>a\*</sup>

<sup>a</sup>Department of Physics, Institute of Chemical Technology Mumbai, Nathalal Parekh Marg, Mumbai-400019

\*Corresponding Author

Email: [nr.jha@ictmumbai.edu.in](mailto:nr.jha@ictmumbai.edu.in)

### Supporting Information

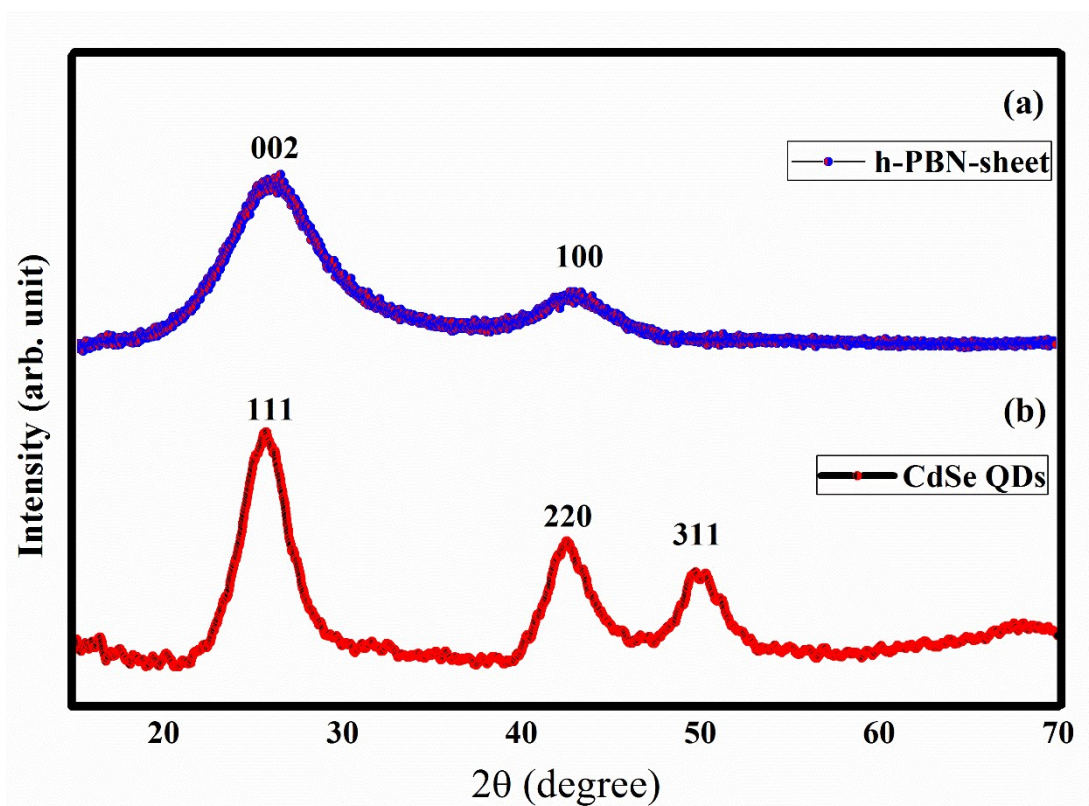

Figure S1: XRD Patterns of the h-PBNs (a), and CdSe QDs (b) samples.

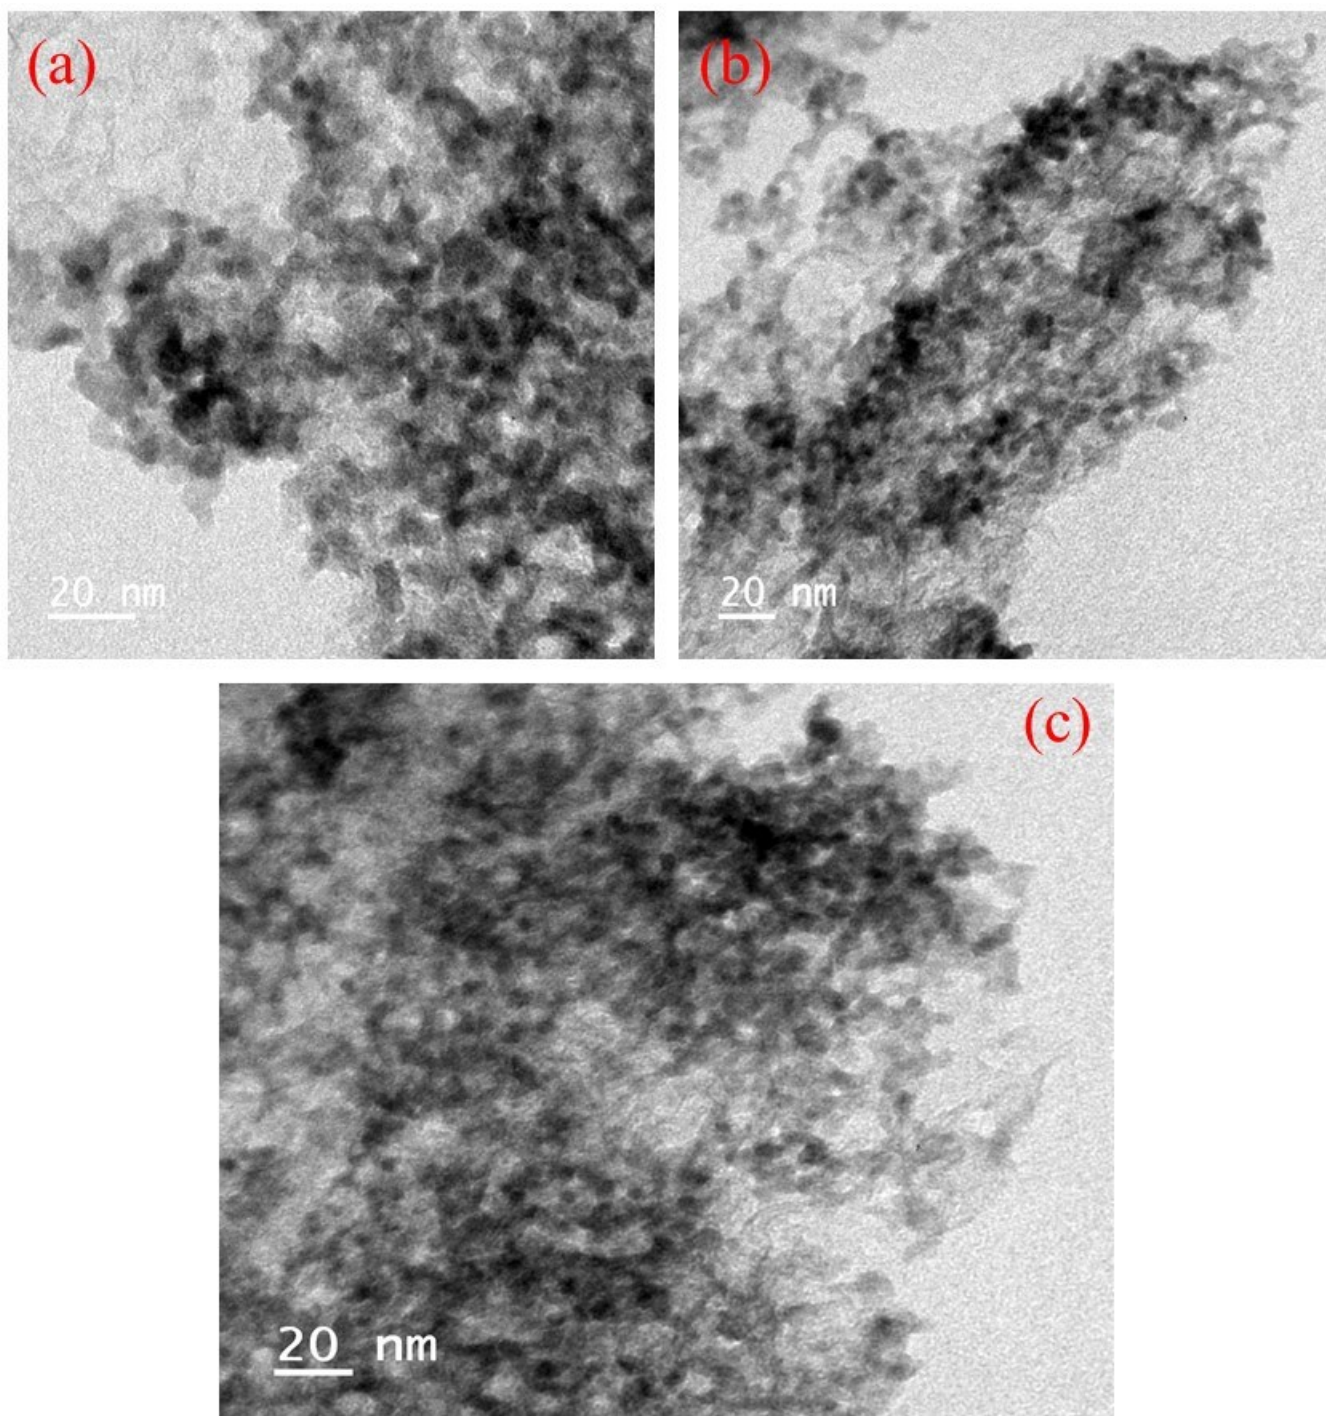

Figure S2: TEM image of uniformly deposited CdSe QDs on h-PBNs.

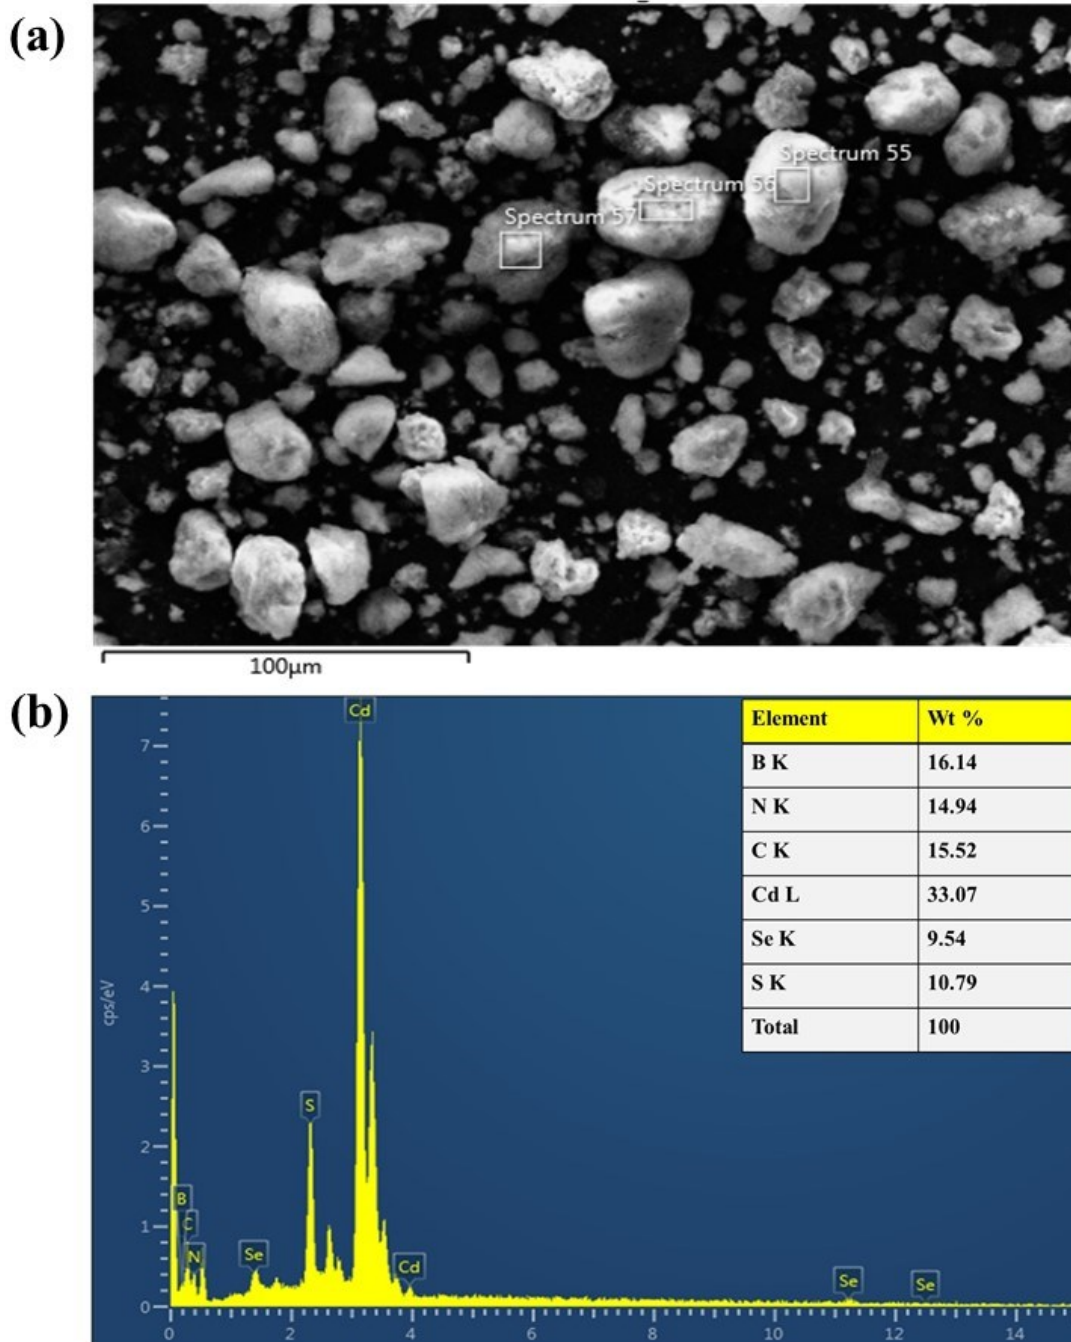

Figure S3: (a) SEM image of 30% h-PBNs/CdSe heterostructure (b) the SEM-EDX area of the 30% h-PBNs/CdSe heterostructure containing B, N, C, Cd, Se, and S elements.
